# Supplementary material
Source: Springer Nature journal article supplement (https://www.springermedizin.de/resource/supplementary/12875_2013_919_MOESM3_ESM.pdf/9435396)
Supplement: MOESM3 [file 9435396]

**Table 2: Patient Characteristics and Antibiotic Prescribing (N = 962)**

| <b>Characteristic</b>                                    | <b>Yes</b>   | <b>No</b> | <b>Not Mentioned</b> | <b>Prescribed antibiotics</b> |
|----------------------------------------------------------|--------------|-----------|----------------------|-------------------------------|
|                                                          | <b>N (%)</b> |           |                      | <b>N (%)</b>                  |
| <b><i>Symptoms</i></b>                                   |              |           |                      |                               |
| Nasal symptoms                                           | 556 (58)     | 112 (12)  | 294 (31)             | 132 (24)                      |
| Sore throat                                              | 471 (49)     | 120 (12)  | 371 (39)             | 101 (21)                      |
| Phlegm/sputum                                            | 375 (39)     | 316 (32)  | 271 (28)             | 91 (24)                       |
| Fevers                                                   | 272 (28)     | 475 (49)  | 215 (22)             | 76 (28)                       |
| Headache                                                 | 223 (23)     | 122 (13)  | 617 (64)             | 64 (29)                       |
| Myalgias                                                 | 187 (19)     | 58 (6)    | 717 (75)             | 46 (25)                       |
| Shortness of breath                                      | 134 (14)     | 352 (37)  | 476 (49)             | 34 (25)                       |
| Chest pain                                               | 108 (11)     | 263 (27)  | 591 (61)             | 19 (18)                       |
| <b><i>Physical exam findings</i></b>                     |              |           |                      |                               |
| Oropharyngeal abnormality                                | 248 (26)     | 496 (52)  | 218 (23)             | 54 (22)                       |
| Lymphadenopathy                                          | 132 (14)     | 613 (64)  | 217 (23)             | 43 (33)                       |
| Tympanic membrane or external auditory canal abnormality | 117 (12)     | 296 (31)  | 549 (57)             | 39 (33)                       |
| Abnormal appearance                                      | 114 (12)     | 632 (66)  | 216 (22)             | 38 (33)                       |
| Abnormal lung sounds                                     | 106 (11)     | 755 (78)  | 101 (10)             | 46 (43)                       |
| Wheezing                                                 | 100 (10)     | 394 (41)  | 468 (49)             | 27 (27)                       |
